# Supplementary material for: Women’s experiences and expectations of intimate partner abuse identification in healthcare settings: a qualitative evidence synthesis
Source: HighWire-hosted journal article supplement (doi:10.1136/bmjopen-2021-058582), 2022-07-01
Supplement: bmjopen-2021-058582supp002_data_supplement.pdf [file bmjopen-2021-058582supp002_data_supplement.pdf]

Supplementary Table 2: GRADE-CERQual Evidence Profile

| Review Finding                     | Contributing Studies                                                    | Assessment of Methodological Limitations                                                                                                                                                                                              | Assessment of Coherence                                                                                                                                                                                                                                  | Assessment of Adequacy                                                                                                                                                                                          | Assessment of Relevance                                                                                                                                                                                                                                                                                                                                                                          | Overall Assessment of Confidence in the Evidence | Explanation of Overall Assessment                                                                                                                            |
|------------------------------------|-------------------------------------------------------------------------|---------------------------------------------------------------------------------------------------------------------------------------------------------------------------------------------------------------------------------------|----------------------------------------------------------------------------------------------------------------------------------------------------------------------------------------------------------------------------------------------------------|-----------------------------------------------------------------------------------------------------------------------------------------------------------------------------------------------------------------|--------------------------------------------------------------------------------------------------------------------------------------------------------------------------------------------------------------------------------------------------------------------------------------------------------------------------------------------------------------------------------------------------|--------------------------------------------------|--------------------------------------------------------------------------------------------------------------------------------------------------------------|
| <i>Provide Universal Education</i> | Twenty studies <sup>5 32 33 35 37-42 44-46 49 51 57 60-62 65 66</sup> . | No or very minor concerns about methodological limitations. Four of the included studies were appraised as high quality and sixteen as moderate quality, with some limited considerations of the researcher-participant relationship. | No or very minor concerns about coherence. This finding reflected the data from the primary studies, capturing that women wanted HCPs to raise the issue and provide information. Variation was also explored in the conflicting views around screening. | Minor concerns regarding adequacy. Twenty-one of the thirty-six included studies supported this theme, leading to minor concerns relating to the quantity of data when compared with the other review findings. | Minor concerns about relevance. Two studies included some participants who had not experienced IPA or did not report IPA <sup>37 38 41</sup> , one study included some survivors of other types of violence <sup>45</sup> , and one study included a small subset of participants who were not women <sup>60</sup> . Care was taken to only include quotations from IPA survivors in this theme. | Moderate confidence.                             | Minor concerns were found relating to adequacy and relevance. No or very minor concerns were found in relation to methodological limitations, and coherence. |

|                                                                       |                                                            |                                                                                                                                                                                                                                                                 |                                                                                                                                                                                               |                                                                                                                                                                                   |                                                                                                                                                                                                                                                                                                                                                                                                                                                                               |                         |                                                                                                                                                                    |
|-----------------------------------------------------------------------|------------------------------------------------------------|-----------------------------------------------------------------------------------------------------------------------------------------------------------------------------------------------------------------------------------------------------------------|-----------------------------------------------------------------------------------------------------------------------------------------------------------------------------------------------|-----------------------------------------------------------------------------------------------------------------------------------------------------------------------------------|-------------------------------------------------------------------------------------------------------------------------------------------------------------------------------------------------------------------------------------------------------------------------------------------------------------------------------------------------------------------------------------------------------------------------------------------------------------------------------|-------------------------|--------------------------------------------------------------------------------------------------------------------------------------------------------------------|
| <p><i>Create a safe and supportive environment for disclosure</i></p> | <p>Thirty-one studies<sup>5 32 34-52 54-60 62-67</sup></p> | <p>Minor concerns about methodological limitations. While studies were appraised as moderate-high quality, fifteen studies included in this theme contained no consideration of the researcher-participant relationship which may have influenced findings.</p> | <p>No or very minor concerns about coherence. Fears experienced, the need for a caring environment, and suggestions for safety promotion were described in detail by the primary studies.</p> | <p>No or very minor concerns about adequacy. Fears implicated in making a disclosure were well supported, as was the need to demonstrate care and recommendations for safety.</p> | <p>Minor concerns about relevance. Two studies included some participants who had not experienced IPA or did not report IPA<sup>37 38 41</sup>, three papers included some survivors of other types of violence<sup>34 45 52</sup>, and two studies included a small subset of participants who were not women<sup>52 60</sup>. These may have informed some of the author's conclusions, and care was taken to only include quotations from IPA survivors in this theme.</p> | <p>High confidence.</p> | <p>Minor concerns were found relating to methodological limitations and relevance. No or very minor concerns were found in relation to coherence and adequacy.</p> |
|-----------------------------------------------------------------------|------------------------------------------------------------|-----------------------------------------------------------------------------------------------------------------------------------------------------------------------------------------------------------------------------------------------------------------|-----------------------------------------------------------------------------------------------------------------------------------------------------------------------------------------------|-----------------------------------------------------------------------------------------------------------------------------------------------------------------------------------|-------------------------------------------------------------------------------------------------------------------------------------------------------------------------------------------------------------------------------------------------------------------------------------------------------------------------------------------------------------------------------------------------------------------------------------------------------------------------------|-------------------------|--------------------------------------------------------------------------------------------------------------------------------------------------------------------|

|                                      |                                                                  |                                                                                                                                                                                                                                                |                                                                                                                                                    |                                                                                                                                          |                                                                                                                                                                                                                                                                                                                                                                                                                                                                      |                         |                                                                                                                                                                  |
|--------------------------------------|------------------------------------------------------------------|------------------------------------------------------------------------------------------------------------------------------------------------------------------------------------------------------------------------------------------------|----------------------------------------------------------------------------------------------------------------------------------------------------|------------------------------------------------------------------------------------------------------------------------------------------|----------------------------------------------------------------------------------------------------------------------------------------------------------------------------------------------------------------------------------------------------------------------------------------------------------------------------------------------------------------------------------------------------------------------------------------------------------------------|-------------------------|------------------------------------------------------------------------------------------------------------------------------------------------------------------|
| <p><i>It's about how you ask</i></p> | <p>Twenty-seven studies<sup>5 32-39 41-51 53 57-64 66</sup>.</p> | <p>No or very minor concerns about methodological limitations. Six of the included studies were appraised as high quality and twenty-one as moderate quality, with some limited considerations of the researcher-participant relationship.</p> | <p>No or very minor concerns about coherence. This theme captured women's experiences and recommendations for practitioner-led identification.</p> | <p>No or very minor concerns about adequacy. Suggestions around how to enquire about IPA were supported in depth by included papers.</p> | <p>Minor concerns about relevance. Two studies included some participants who had not experienced IPA or did not report IPA<sup>37 38 41</sup>, two studies included some survivors of other types of violence<sup>34 45</sup>, and one study included a small subset of participants who were not women<sup>60</sup>. These may have informed some of the author's conclusions, and care was taken to only include quotations from IPA survivors in this theme.</p> | <p>High confidence.</p> | <p>Minor concerns were found relating to relevance. No or very minor concerns were found in relation to methodological limitations, coherence, and adequacy.</p> |
|--------------------------------------|------------------------------------------------------------------|------------------------------------------------------------------------------------------------------------------------------------------------------------------------------------------------------------------------------------------------|----------------------------------------------------------------------------------------------------------------------------------------------------|------------------------------------------------------------------------------------------------------------------------------------------|----------------------------------------------------------------------------------------------------------------------------------------------------------------------------------------------------------------------------------------------------------------------------------------------------------------------------------------------------------------------------------------------------------------------------------------------------------------------|-------------------------|------------------------------------------------------------------------------------------------------------------------------------------------------------------|
